# Supplementary material for: Flow-Through Amperometric Biosensor System Based on Functionalized Aryl Derivative of Phenothiazine and PAMAM-Calix-Dendrimers for the Determination of Uric Acid
Source: MDPI journal article supplement (doi:10.3390/bios14030120), 2024-02-23
Supplement: s1 [file s1]

## Supplementary Materials

to the article of Dmitry Stoikov, Alexey Ivanov, Insiya Shafigullina, Milena Gavrikova, Pavel Padnya, Igor Shiabiev, Ivan Stoikov and Gennady Evtugyn "Flow-through amperometric biosensor system based on functionalized aryl derivative of phenothiazine and PA-MAM-calix-dendrimers for the determination of uric acid"

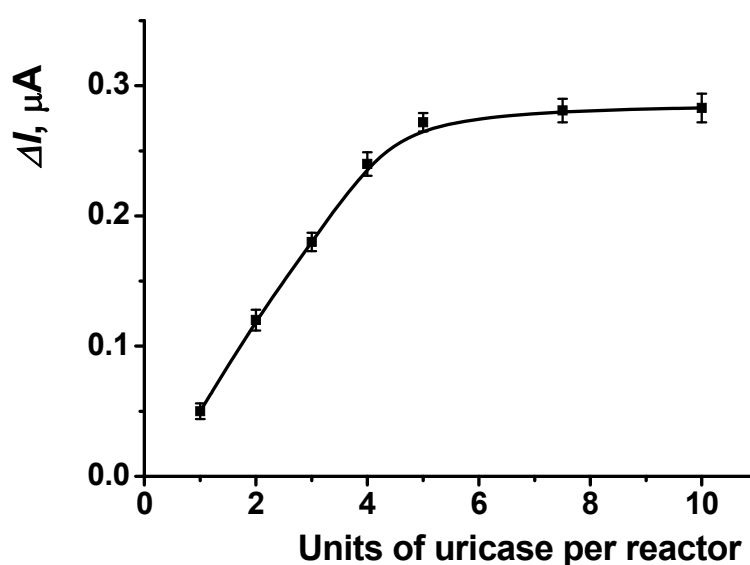

**Figure S1.** The dependence of response of the flow-through biosensor system to 20  $\mu\text{M}$  uric acid on amount of uricase used for immobilization. The data obtained with SPE modified with CB + pillar[5]arene + PAMAM-calix-dendrimer G2 + poly(PhTz-(NH<sub>2</sub>)<sub>2</sub>), potential -0.35 V, flow rate 0.2 mL·min<sup>-1</sup>. Measurements in 0.01 phosphate buffer + 0.1 M NaCl, pH = 8.0.

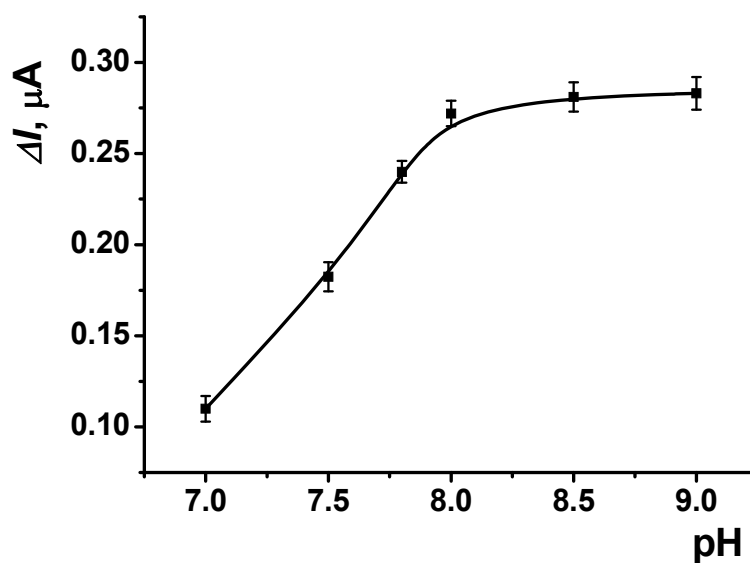

**Figure S2.** The dependence of response of the flow-through biosensor system to 20  $\mu M$  uric acid on pH of solution. The data obtained with SPE modified with CB + pillar[5]arene + PAMAM-calix-dendrimer G2 + poly(PhTz-(NH<sub>2</sub>)<sub>2</sub>), potential -0.35 V, flow rate 0.2 mL·min<sup>-1</sup>. Measurements in 0.01 phosphate buffer + 0.1 M NaCl.

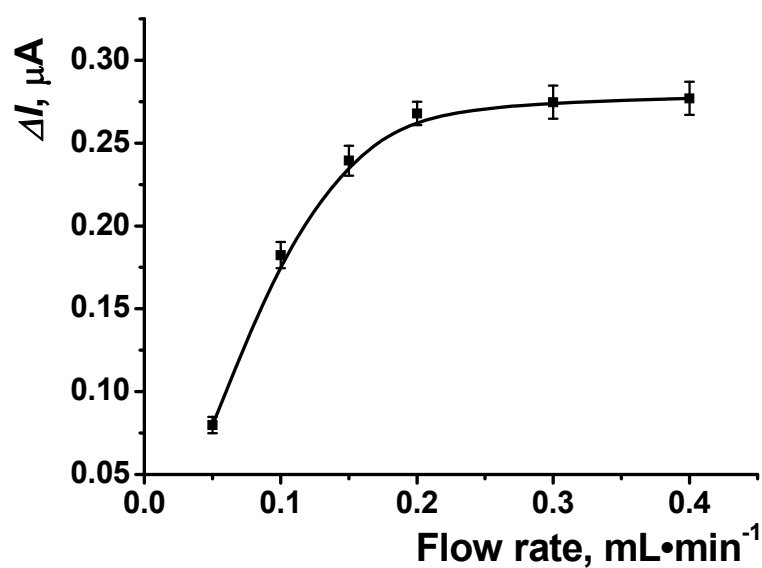

**Figure S3.** The dependence of response of the flow-through biosensor system to 20  $\mu M$  uric acid on flow rate of solution. The data obtained with SPE modified with CB + pillar[5]arene + PAMAM-calix-dendrimer G2 + poly(PhTz-(NH<sub>2</sub>)<sub>2</sub>), potential -0.35 V. Measurements in 0.01 phosphate buffer + 0.1 M NaCl, pH = 8.0.

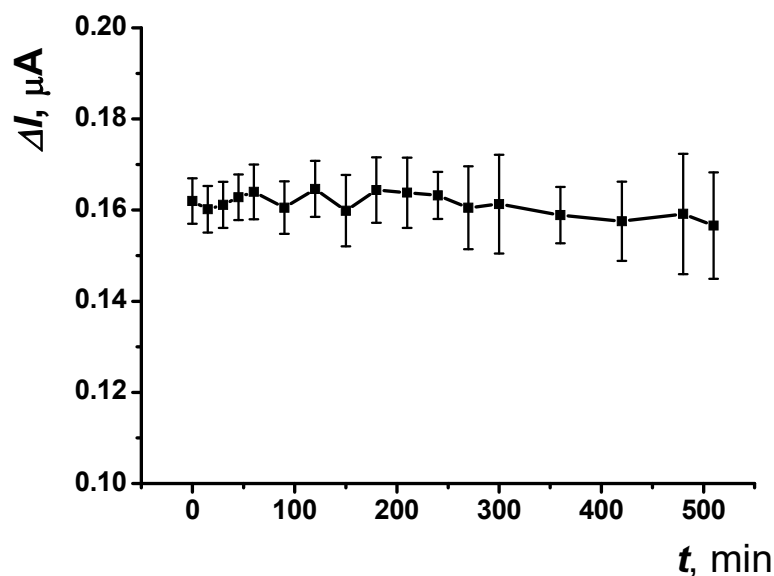

**Figure S4.** Time dependency of response of the flow-through biosensor system to 10  $\mu\text{M}$  uric acid. The data obtained with SPE modified with CB + pillar[5]arene + PAMAM-calix-dendrimer G2 + poly(PhTz-(NH<sub>2</sub>)<sub>2</sub>), potential -0.35 V, flow rate 0.2 mL·min<sup>-1</sup>. Measurements in 0.01 phosphate buffer + 0.1 M NaCl, pH = 8.0. The mean and standard deviation values for 5 electrodes are presented.

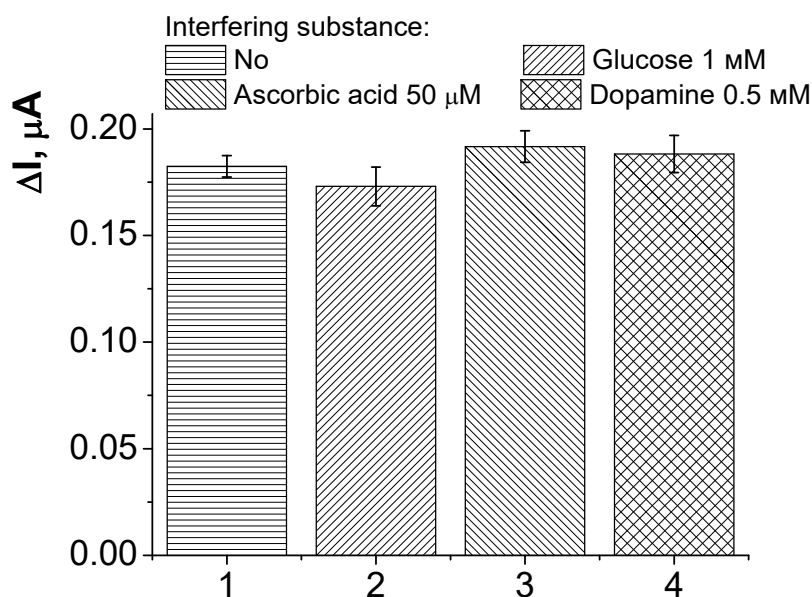

**Figure S5.** Influence of interfering substances to response of the flow-through biosensor system measured in presence of 10  $\mu\text{M}$  uric acid and 1 – No interfering substance, 2 – Glucose 1 mM, 3 – Ascorbic acid 50  $\mu\text{M}$ , 4 – Dopamine 0.5 mM. The data obtained with SPE modified with CB + pillar[5]arene + PAMAM-calix-dendrimer G2 + poly(PhTz-(NH<sub>2</sub>)<sub>2</sub>), potential -0.35 V, flow rate 0.2 mL·min<sup>-1</sup>. Measurements in 0.01 phosphate buffer + 0.1 M NaCl, pH = 8.0. The mean and standard deviation values for 5 electrodes are presented.
